# Supplementary material
Source: publisher site journal article supplement (https://www.spandidos-publications.com/7082/downloadSupplementary)
Supplement: Supplementary file 1 [file downloadSupplementary]

## Sheet: TFK-1
Table SII. Genetic variants in DDR genes of all studied cholangiocarcinoma and their clinical relevance according to the Association for Molecular Pathology guidelines.
Chromosome	Position (bp)	Variant ID	Reference allele	Alternate allele	Gene name	Functional consequence	Exonic function	Amino acid change	Clinical evidence
2	215632255	rs2070094	C	T	BARD1	exonic	missense SNV	BARD1:NM_001282543:exon5:c.G1462A:p.V488M,BARD1:NM_000465:exon6:c.G1519A:p.V507M	Tier 4
2	215645464	rs2229571	C	G	BARD1	exonic	missense SNV	BARD1:NM_001282543:exon3:c.G1077C:p.R359S,BARD1:NM_000465:exon4:c.G1134C:p.R378S	Tier 4
2	215645876	rs3738885	G	C	BARD1	exonic	missense SNV	BARD1:NM_001282543:exon3:c.C665G:p.S222C,BARD1:NM_000465:exon4:c.C722G:p.S241C	Tier 4
2	215674224	rs1048108	G	A	BARD1	exonic	missense SNV	BARD1:NM_000465:exon1:c.C70T:p.P24S,BARD1:NM_001282543:exon1:c.C70T:p.P24S,BARD1:NM_001282545:exon1:c.C70T:p.P24S,BARD1:NM_001282548:exon1:c.C70T:p.P24S,BARD1:NM_001282549:exon1:c.C70T:p.P24S	Tier 4
3	52437795	.	G	A	BAP1	exonic	stopgain	BAP1:NM_004656:exon13:c.C1366T:p.Q456X	Tier 3
3	142281612	rs2227928	A	G	ATR	exonic	missense SNV	ATR:NM_001184:exon4:c.T632C:p.M211T	Tier 4
8	30999280	rs1801195	G	T	WRN	exonic	missense SNV	WRN:NM_000553:exon26:c.G3222T:p.L1074F	Tier 4
11	108183167	rs659243	A	G	ATM	exonic	missense SNV	ATM:NM_000051:exon40:c.A5948G:p.N1983S	Tier 4
13	32906480	rs766173	A	C	BRCA2	exonic	missense SNV	BRCA2:NM_000059:exon10:c.A865C:p.N289H	Tier 4
13	32906558	rs79483201	T	A	BRCA2	exonic	missense SNV	BRCA2:NM_000059:exon10:c.T943A:p.C315S	Tier 4
13	32911463	rs1799944	A	G	BRCA2	exonic	missense SNV	BRCA2:NM_000059:exon11:c.A2971G:p.N991D	Tier 4
13	32929387	rs169547	T	C	BRCA2	exonic	missense SNV	BRCA2:NM_000059:exon14:c.T7397C:p.V2466A	Tier 4
16	23641247	rs141749524	T	C	PALB2	exonic	missense SNV	PALB2:NM_024675:exon5:c.A2228G:p.Y743C	Tier 3
16	89836323	rs7195066	C	T	FANCA	exonic	missense SNV	FANCA:NM_000135:exon26:c.G2426A:p.G809D,FANCA:NM_001286167:exon26:c.G2426A:p.G809D	Tier 4
16	89849480	rs2239359	C	T	FANCA	exonic	missense SNV	FANCA:NM_000135:exon16:c.G1501A:p.G501S,FANCA:NM_001286167:exon16:c.G1501A:p.G501S	Tier 4
16	89866043	rs7190823	T	C	FANCA	exonic	missense SNV	FANCA:NM_000135:exon9:c.A796G:p.T266A,FANCA:NM_001018112:exon9:c.A796G:p.T266A,FANCA:NM_001286167:exon9:c.A796G:p.T266A	Tier 4
17	59763347	rs4986764	A	G	BRIP1	exonic	missense SNV	BRIP1:NM_032043:exon19:c.T2755C:p.S919P	Tier 4

## Sheet: HuH-28
Chromosome	Position (bp)	Variant ID	Reference allele	Alternate allele	Gene name	Functional consequence	Exonic function	Amino acid change	Clinical evidence
1	27023427	.	G	T	ARID1A	exonic	missense SNV	ARID1A:NM_006015:exon1:c.G533T:p.S178I,ARID1A:NM_139135:exon1:c.G533T:p.S178I	Tier 3
1	27088666	.	A	G	ARID1A	exonic	missense SNV	ARID1A:NM_006015:exon7:c.A2275G:p.M759V,ARID1A:NM_139135:exon7:c.A2275G:p.M759V	Tier 3
2	215632255	rs2070094	C	T	BARD1	exonic	missense SNV	BARD1:NM_001282543:exon5:c.G1462A:p.V488M,BARD1:NM_000465:exon6:c.G1519A:p.V507M	Tier 4
2	215645464	rs2229571	C	G	BARD1	exonic	missense SNV	BARD1:NM_001282543:exon3:c.G1077C:p.R359S,BARD1:NM_000465:exon4:c.G1134C:p.R378S	Tier 4
2	215674224	rs1048108	G	A	BARD1	exonic	missense SNV	BARD1:NM_000465:exon1:c.C70T:p.P24S,BARD1:NM_001282543:exon1:c.C70T:p.P24S,BARD1:NM_001282545:exon1:c.C70T:p.P24S,BARD1:NM_001282548:exon1:c.C70T:p.P24S,BARD1:NM_001282549:exon1:c.C70T:p.P24S	Tier 4
3	142281612	rs2227928	A	G	ATR	exonic	missense SNV	ATR:NM_001184:exon4:c.T632C:p.M211T	Tier 4
6	157099215	.	C	G	ARID1B	exonic	missense SNV	ARID1B:NM_017519:exon1:c.C152G:p.S51C,ARID1B:NM_020732:exon1:c.C152G:p.S51C	Tier 3
8	30999280	rs1801195	G	T	WRN	exonic	missense SNV	WRN:NM_000553:exon26:c.G3222T:p.L1074F	Tier 4
11	108183167	rs659243	A	G	ATM	exonic	missense SNV	ATM:NM_000051:exon40:c.A5948G:p.N1983S	Tier 4
13	32929387	rs169547	T	C	BRCA2	exonic	missense SNV	BRCA2:NM_000059:exon14:c.T7397C:p.V2466A	Tier 4
15	91292635	.	A	G	BLM	exonic	missense SNV	BLM:NM_000057:exon3:c.A137G:p.N46S,BLM:NM_001287247:exon3:c.A137G:p.N46S,BLM:NM_001287246:exon4:c.A137G:p.N46S	Tier 3
15	91295110	rs28384991	C	T	BLM	exonic	missense SNV	BLM:NM_000057:exon4:c.C893T:p.T298M,BLM:NM_001287247:exon4:c.C893T:p.T298M,BLM:NM_001287246:exon5:c.C893T:p.T298M	Tier 4
16	89836323	rs7195066	C	T	FANCA	exonic	missense SNV	FANCA:NM_000135:exon26:c.G2426A:p.G809D,FANCA:NM_001286167:exon26:c.G2426A:p.G809D	Tier 4
16	89849480	rs2239359	C	T	FANCA	exonic	missense SNV	FANCA:NM_000135:exon16:c.G1501A:p.G501S,FANCA:NM_001286167:exon16:c.G1501A:p.G501S	Tier 4
16	89866043	rs7190823	T	C	FANCA	exonic	missense SNV	FANCA:NM_000135:exon9:c.A796G:p.T266A,FANCA:NM_001018112:exon9:c.A796G:p.T266A,FANCA:NM_001286167:exon9:c.A796G:p.T266A	Tier 4
17	59763347	rs4986764	A	G	BRIP1	exonic	missense SNV	BRIP1:NM_032043:exon19:c.T2755C:p.S919P	Tier 4
X	76937963	rs3088074	G	C	ATRX	exonic	missense SNV	ATRX:NM_138270:exon8:c.C2671G:p.Q891E,ATRX:NM_000489:exon9:c.C2785G:p.Q929E	Tier 4

## Sheet: SiSP-K01
Chromosome	Start position (bp)	End position (bp)	Reference allele	Alternate allele	Functional consequence	Gene name	Exonic function	Amino acid change	Clinical evidence
chr1	27023451	27023453	GCG	-	exonic	ARID1A	nonframeshift deletion	ARID1A:NM_006015:exon1:c.557_559del:p.G191del,ARID1A:NM_139135:exon1:c.557_559del:p.G191del	Tier 3
chr1	27087503	27087503	C	T	exonic	ARID1A	stopgain	ARID1A:NM_006015:exon5:c.C2077T:p.R693X,ARID1A:NM_139135:exon5:c.C2077T:p.R693X	Tier 3
chr1	27105697	27105697	-	AGGTAAATAAATGGCCTATATATTATCCAAGGTGGAATTTGGGTCTCTGTAGCACCAGCTTGGACCAGTGTTTGGAGAGCTGAAGCCTC	exonic	ARID1A	stopgain	ARID1A:NM_006015:exon20:c.5308_5309insAGGTAAATAAATGGCCTATATATTATCCAAGGTGGAATTTGGGTCTCTGTAGCACCAGCTTGGACCAGTGTTTGGAGAGCTGAAGCCTC:p.G1770Efs*26,ARID1A:NM_139135:exon20:c.4657_4658insAGGTAAATAAATGGCCTATATATTATCCAAGGTGGAATTTGGGTCTCTGTAGCACCAGCTTGGACCAGTGTTTGGAGAGCTGAAGCCTC:p.G1553Efs*26	NA
chr6	157099872	157099874	CCG	-	exonic	ARID1B	nonframeshift deletion	ARID1B:NM_001346813:exon1:c.809_811del:p.A274del,ARID1B:NM_017519:exon1:c.809_811del:p.A274del,ARID1B:NM_020732:exon1:c.809_811del:p.A274del	NA
chr6	157100397	157100399	CGC	-	exonic	ARID1B	nonframeshift deletion	ARID1B:NM_001346813:exon1:c.1334_1336del:p.P450del,ARID1B:NM_017519:exon1:c.1334_1336del:p.P450del,ARID1B:NM_020732:exon1:c.1334_1336del:p.P450del	NA
chr6	157222582	157222647	CAGCCGCAGCCCCCGCACCTCCCACCCCAGGCGCAGTATCTGCCGTCCCAGTCCCAGCAGAGGTAC	-	exonic	ARID1B	nonframeshift deletion	ARID1B:NM_001346813:exon3:c.1810_1875del:p.P607_Q628del,ARID1B:NM_017519:exon3:c.1810_1875del:p.P607_Q628del,ARID1B:NM_020732:exon4:c.1849_1914del:p.P620_Q641del	NA
chr6	157099166	157099168	TCC	-	exonic	ARID1B	nonframeshift deletion	ARID1B:NM_001346813:exon1:c.103_105del:p.S41del,ARID1B:NM_017519:exon1:c.103_105del:p.S41del,ARID1B:NM_020732:exon1:c.103_105del:p.S41del	NA
chr11	108139320	108139320	-	TGCACTTGTCCTGGACAAGCCAGCAGAGGGACAGGAAGCCAGAAGTGACCAGGGGCCATTCATCAGTAGCTGGTGGTGCTGGCCAG	exonic	ATM	frameshift insertion	ATM:NM_000051:exon18:c.2822_2823insTGCACTTGTCCTGGACAAGCCAGCAGAGGGACAGGAAGCCAGAAGTGACCAGGGGCCATTCATCAGTAGCTGGTGGTGCTGGCCAG:p.L942Afs*35	NA
chr3	142274739	142274739	-	T	exonic	ATR	frameshift insertion	ATR:NM_001184:exon10:c.2320dupA:p.I774Nfs*2	Tier 3
chrX	76931742	76931744	TCA	-	exonic	ATRX	nonframeshift deletion	ATRX:NM_138270:exon9:c.3672_3674del:p.D1226del,ATRX:NM_000489:exon10:c.3786_3788del:p.D1264del	Tier 3
chrX	76938707	76938707	A	-	exonic	ATRX	frameshift deletion	ATRX:NM_138270:exon8:c.1927delT:p.C643Vfs*14,ATRX:NM_000489:exon9:c.2041delT:p.C681Vfs*14	Tier 3
chrX	76938710	76938710	C	-	exonic	ATRX	frameshift deletion	ATRX:NM_138270:exon8:c.1924delG:p.E642Nfs*15,ATRX:NM_000489:exon9:c.2038delG:p.E680Nfs*15	Tier 3
chrX	76938712	76938712	-	AGAGG	exonic	ATRX	frameshift insertion	ATRX:NM_138270:exon8:c.1921_1922insCCTCT:p.E641Afs*18,ATRX:NM_000489:exon9:c.2035_2036insCCTCT:p.E679Afs*18	Tier 3
chrX	76938713	76938713	C	A	exonic	ATRX	stopgain	ATRX:NM_138270:exon8:c.G1921T:p.E641X,ATRX:NM_000489:exon9:c.G2035T:p.E679X	Tier 3
chrX	76938720	76938741	ATTAGATGTTACAGGGTTAGTT	-	exonic	ATRX	frameshift deletion	ATRX:NM_138270:exon8:c.1893_1914del:p.E631Dfs*19,ATRX:NM_000489:exon9:c.2007_2028del:p.E669Dfs*19	Tier 3
chrX	76938745	76938745	G	-	exonic	ATRX	frameshift deletion	ATRX:NM_138270:exon8:c.1889delC:p.T630Kfs*5,ATRX:NM_000489:exon9:c.2003delC:p.T668Kfs*5	Tier 3
chrX	76938748	76938748	-	AA	exonic	ATRX	frameshift insertion	ATRX:NM_138270:exon8:c.1885_1886insTT:p.P629Lfs*7,ATRX:NM_000489:exon9:c.1999_2000insTT:p.P667Lfs*7	Tier 3
chrX	76938749	76938749	-	A	exonic	ATRX	frameshift insertion	ATRX:NM_138270:exon8:c.1884_1885insT:p.P629Sfs*4,ATRX:NM_000489:exon9:c.1998_1999insT:p.P667Sfs*4	Tier 3
chrX	76938752	76938752	G	C	exonic	ATRX	nonsynonymous SNV	ATRX:NM_138270:exon8:c.C1882G:p.R628G,ATRX:NM_000489:exon9:c.C1996G:p.R666G	Tier 3
chrX	76938755	76938755	T	A	exonic	ATRX	nonsynonymous SNV	ATRX:NM_138270:exon8:c.A1879T:p.R627W,ATRX:NM_000489:exon9:c.A1993T:p.R665W	Tier 3
chrX	76938757	76938760	AAGG	-	exonic	ATRX	frameshift deletion	ATRX:NM_138270:exon8:c.1874_1877del:p.P625Rfs*9,ATRX:NM_000489:exon9:c.1988_1991del:p.P663Rfs*9	Tier 3
chrX	76938783	76938783	T	-	exonic	ATRX	frameshift deletion	ATRX:NM_138270:exon8:c.1851delA:p.R617Sfs*4,ATRX:NM_000489:exon9:c.1965delA:p.R655Sfs*4	Tier 3
chrX	76938785	76938786	TT	-	exonic	ATRX	frameshift deletion	ATRX:NM_138270:exon8:c.1848_1849del:p.R617Ifs*15,ATRX:NM_000489:exon9:c.1962_1963del:p.R655Ifs*15	Tier 3
chr2	215593426	215593426	-	AGCACTTACCCCATCCCCTGTTTGAAAGCTTCAATCAACTCGTTCTTTTTATTCTGATCTTCCACCCAATACACACTT	exonic	BARD1	stopgain	BARD1:NM_001282549:exon5:c.768_769insAAGTGTGTATTGGGTGGAAGATCAGAATAAAAAGAACGAGTTGATTGAAGCTTTCAAACAGGGGATGGGGTAAGTGCT:p.F257_S264delinsKCVLGGRSE,BARD1:NM_001282548:exon6:c.897_898insAAGTGTGTATTGGGTGGAAGATCAGAATAAAAAGAACGAGTTGATTGAAGCTTTCAAACAGGGGATGGGGTAAGTGCT:p.F300_S307delinsKCVLGGRSE,BARD1:NM_001282545:exon7:c.954_955insAAGTGTGTATTGGGTGGAAGATCAGAATAAAAAGAACGAGTTGATTGAAGCTTTCAAACAGGGGATGGGGTAAGTG…	NA
chr2	215593428	215593428	-	AATT	exonic	BARD1	stopgain	BARD1:NM_001282549:exon5:c.766_767insAATT:p.S256fs*0,BARD1:NM_001282548:exon6:c.895_896insAATT:p.S299fs*0,BARD1:NM_001282545:exon7:c.952_953insAATT:p.S318fs*0,BARD1:NM_001282543:exon10:c.2248_2249insAATT:p.S750fs*0,BARD1:NM_000465:exon11:c.2305_2306insAATT:p.S769fs*0	NA
chr2	215593430	215593430	-	AAACTCTGAT	exonic	BARD1	frameshift insertion	BARD1:NM_001282549:exon5:c.764_765insATCAGAGTTT:p.M255Ifs*6,BARD1:NM_001282548:exon6:c.893_894insATCAGAGTTT:p.M298Ifs*6,BARD1:NM_001282545:exon7:c.950_951insATCAGAGTTT:p.M317Ifs*6,BARD1:NM_001282543:exon10:c.2246_2247insATCAGAGTTT:p.M749Ifs*6,BARD1:NM_000465:exon11:c.2303_2304insATCAGAGTTT:p.M768Ifs*6	NA
chr17	41243638	41243638	-	AAGGTT	exonic	BRCA1	nonframeshift insertion	BRCA1:NM_007297:exon9:c.3768_3769insAACCTT:p.L1256_E1257insNL,BRCA1:NM_007294:exon10:c.3909_3910insAACCTT:p.L1303_E1304insNL,BRCA1:NM_007300:exon10:c.3909_3910insAACCTT:p.L1303_E1304insNL	Tier 3
chr17	41243639	41243639	-	GTCCATGGATGATTTTTGTTTATCTGTATTTTCTAAGTTTTCTATGATGCACATATATAACTTTATAAGAATATCAGGCTTTTCTCAACTTCATCT	exonic	BRCA1	stopgain	BRCA1:NM_007297:exon9:c.3767_3768insAGATGAAGTTGAGAAAAGCCTGATATTCTTATAAAGTTATATATGTGCATCATAGAAAACTTAGAAAATACAGATAAACAAAAATCATCCATGGAC:p.E1257_Y1816delinsDEVEKSLIFL,BRCA1:NM_007294:exon10:c.3908_3909insAGATGAAGTTGAGAAAAGCCTGATATTCTTATAAAGTTATATATGTGCATCATAGAAAACTTAGAAAATACAGATAAACAAAAATCATCCATGGAC:p.E1304_Y1863delinsDEVEKSLIFL,BRCA1:NM_007300:exon10:c.3908_3909insAGATGAAGTTGAGAAAAGCCTGATATTCTTATAAA…	NA
chr17	41246202	41246202	-	CC	exonic	BRCA1	frameshift insertion	BRCA1:NM_007297:exon9:c.1204_1205insGG:p.S402Wfs*4,BRCA1:NM_007294:exon10:c.1345_1346insGG:p.S449Wfs*4,BRCA1:NM_007300:exon10:c.1345_1346insGG:p.S449Wfs*4	NA
chr17	41246208	41246209	AC	-	exonic	BRCA1	frameshift deletion	BRCA1:NM_007297:exon9:c.1198_1199del:p.V400Sfs*7,BRCA1:NM_007294:exon10:c.1339_1340del:p.V447Sfs*7,BRCA1:NM_007300:exon10:c.1339_1340del:p.V447Sfs*7	Tier 2
chr17	41246211	41246232	CTTTCACTTTTACATATTAAAG	-	exonic	BRCA1	frameshift deletion	BRCA1:NM_007297:exon9:c.1175_1196del:p.A392Efs*6,BRCA1:NM_007294:exon10:c.1316_1337del:p.A439Efs*6,BRCA1:NM_007300:exon10:c.1316_1337del:p.A439Efs*6	Tier 2
chr17	41246243	41246246	ATCA	-	exonic	BRCA1	frameshift deletion	BRCA1:NM_007297:exon9:c.1161_1164del:p.D388Lfs*4,BRCA1:NM_007294:exon10:c.1302_1305del:p.D435Lfs*4,BRCA1:NM_007300:exon10:c.1302_1305del:p.D435Lfs*4	Tier 2
chr17	41246249	41246253	GGCCA	-	exonic	BRCA1	frameshift deletion	BRCA1:NM_007297:exon9:c.1154_1158del:p.L385Qfs*1,BRCA1:NM_007294:exon10:c.1295_1299del:p.L432Qfs*1,BRCA1:NM_007300:exon10:c.1295_1299del:p.L432Qfs*1	Tier 2
chr17	41246258	41246260	GTC	-	exonic	BRCA1	nonframeshift deletion	BRCA1:NM_007297:exon9:c.1147_1149del:p.D383del,BRCA1:NM_007294:exon10:c.1288_1290del:p.D430del,BRCA1:NM_007300:exon10:c.1288_1290del:p.D430del	Tier 3
chr17	41246264	41246264	T	G	exonic	BRCA1	nonsynonymous SNV	BRCA1:NM_007297:exon9:c.A1143C:p.K381N,BRCA1:NM_007294:exon10:c.A1284C:p.K428N,BRCA1:NM_007300:exon10:c.A1284C:p.K428N	Tier 3
chr17	41246266	41246271	TCTCTG	-	exonic	BRCA1	stopgain	BRCA1:NM_007297:exon9:c.1136_1141del:p.S379_Y1816del,BRCA1:NM_007294:exon10:c.1277_1282del:p.S426_Y1863del,BRCA1:NM_007300:exon10:c.1277_1282del:p.S426_Y1884del	Tier 2
chr17	41246273	41246273	-	AAGT	exonic	BRCA1	frameshift insertion	BRCA1:NM_007297:exon9:c.1133_1134insACTT:p.S379Lfs*10,BRCA1:NM_007294:exon10:c.1274_1275insACTT:p.S426Lfs*10,BRCA1:NM_007300:exon10:c.1274_1275insACTT:p.S426Lfs*10	Tier 2
chr17	41246277	41246278	CC	-	exonic	BRCA1	frameshift deletion	BRCA1:NM_007297:exon9:c.1129_1130del:p.G377Ffs*10,BRCA1:NM_007294:exon10:c.1270_1271del:p.G424Ffs*10,BRCA1:NM_007300:exon10:c.1270_1271del:p.G424Ffs*10	Tier 2
chr17	41246282	41246283	AT	-	exonic	BRCA1	frameshift deletion	BRCA1:NM_007297:exon9:c.1124_1125del:p.Y375Ffs*12,BRCA1:NM_007294:exon10:c.1265_1266del:p.Y422Ffs*12,BRCA1:NM_007300:exon10:c.1265_1266del:p.Y422Ffs*12	Tier 2
chr17	41246289	41246289	T	-	exonic	BRCA1	frameshift deletion	BRCA1:NM_007297:exon9:c.1118delA:p.D373Vfs*9,BRCA1:NM_007294:exon10:c.1259delA:p.D420Vfs*9,BRCA1:NM_007300:exon10:c.1259delA:p.D420Vfs*9	Tier 2
chr17	41246291	41246306	TACCTCATTTAGAACG	-	exonic	BRCA1	frameshift deletion	BRCA1:NM_007297:exon9:c.1101_1116del:p.D367Efs*10,BRCA1:NM_007294:exon10:c.1242_1257del:p.D414Efs*10,BRCA1:NM_007300:exon10:c.1242_1257del:p.D414Efs*10	Tier 2
chr17	41246372	41246377	CAGTTC	-	exonic	BRCA1	nonframeshift deletion	BRCA1:NM_007297:exon9:c.1030_1035del:p.E344_L345del,BRCA1:NM_007294:exon10:c.1171_1176del:p.E391_L392del,BRCA1:NM_007300:exon10:c.1171_1176del:p.E391_L392del	Tier 3
chr13	32953940	32953940	-	TT	exonic	BRCA2	frameshift insertion	BRCA2:NM_000059:exon23:c.9007_9008insTT:p.G3003Vfs*25	Tier 2
chr13	32953946	32953946	-	T	exonic	BRCA2	frameshift insertion	BRCA2:NM_000059:exon23:c.9013_9014insT:p.R3005Mfs*11	Tier 2
chr13	32953951	32953953	CAG	-	exonic	BRCA2	stopgain	BRCA2:NM_000059:exon23:c.9018_9020del:p.Y3006_I3418del	Tier 2
chr13	32953957	32953957	-	CTG	exonic	BRCA2	nonframeshift insertion	BRCA2:NM_000059:exon23:c.9024_9025insCTG:p.I3008_Y3009insL	Tier 3
chr13	32953962	32953962	A	-	exonic	BRCA2	frameshift deletion	BRCA2:NM_000059:exon23:c.9029delA:p.H3010Lfs*17	Tier 2
chr13	32953964	32953964	-	ATTTTGTTAGTAAGGTCATTTTTTAAGTTAATAAAACTGATAAAAACAAAGCATTTACATACTTACCTGAATCTTTTTCTTTT	exonic	BRCA2	stopgain	BRCA2:NM_000059:exon23:c.9031_9032insATTTTGTTAGTAAGGTCATTTTTTAAGTTAATAAAACTGATAAAAACAAAGCATTTACATACTTACCTGAATCTTTTTCTTTT:p.L3011Hfs*8	NA
chr13	32969009	32969009	-	AATATCATGATGATGATGA	exonic	BRCA2	stopgain	BRCA2:NM_000059:exon25:c.9440_9441insAATATCATGATGATGATGA:p.A3148Ifs*2	Tier 2
chr16	23646347	23646347	-	AAGTAAATCTAATGTTTTTTAGGTCGTGAGTAGTAAGTTCACTGCTACCTTTAGGAGGAATGTGTTCAAGGTGCTGA	exonic	PALB2	stopgain	PALB2:NM_024675:exon4:c.1519_1520insTCAGCACCTTGAACACATTCCTCCTAAAGGTAGCAGTGAACTTACTACTCACGACCTAAAAAACATTAGATTTACTT:p.A507Vfs*19	NA
chr16	23646764	23646841	TTTTCATTCCTGCCATCAAGAGTGTCACTGGGAGATTTTAAAGATTTCTCTGTTTGATTTTGTTCTTTTAAGTTTTGG	-	exonic	PALB2	nonframeshift deletion	PALB2:NM_024675:exon4:c.1026_1103del:p.Q343_N368del	Tier 3
chr16	23647323	23647423	TTTCTTCCTGTTCCTTTAGTCTTTTCCCAGACAATCTGAGTGAATCAGTGCCAAAGACACAGTCTCTCTCCTGTGAAATAAATGTCCTCTTCTGCTGCTTC	-	exonic	PALB2	frameshift deletion	PALB2:NM_024675:exon4:c.444_544del:p.K148Nfs*2	Tier 2
chr14	69006919	69006920	TC	-	exonic	RAD51B	frameshift deletion	RAD51B:NM_001321812:exon10:c.1039_1040del:p.S347fs*0,RAD51B:NM_001321814:exon11:c.1039_1040del:p.S347fs*0	Tier 3
chr14	69061250	69061251	AA	TG	exonic	RAD51B	nonframeshift substitution	RAD51B:NM_133509:exon11:c.1085_1086TG:p.E362V	Tier 3
chr8	30945390	30945390	A	T	exonic	WRN	nonsynonymous SNV	WRN:NM_000553:exon12:c.A1530T:p.E510D	Tier 4

## Sheet: SiSP-K05
Chromosome	Start position (bp)	End position (bp)	Reference allele	Alternate allele	Functional consequence	Gene name	Exonic function	Amino acid change	Clinical evidence
chr1	27097776	27097776	-	TCTGATAGGAGGTGGAGCTCAGGCAGTAATGCTCCCTTGCCTGCCACTTACCCCCTGCTGTGCGGCCTGG	exonic	ARID1A	frameshift insertion	ARID1A:NM_006015:exon12:c.3365_3366insTCTGATAGGAGGTGGAGCTCAGGCAGTAATGCTCCCTTGCCTGCCACTTACCCCCTGCTGTGCGGCCTGG:p.S1123Lfs*92,ARID1A:NM_139135:exon12:c.3365_3366insTCTGATAGGAGGTGGAGCTCAGGCAGTAATGCTCCCTTGCCTGCCACTTACCCCCTGCTGTGCGGCCTGG:p.S1123Lfs*92	NA
chr1	27097781	27097781	A	T	exonic	ARID1A	stopgain	ARID1A:NM_006015:exon12:c.A3370T:p.K1124X,ARID1A:NM_139135:exon12:c.A3370T:p.K1124X	Tier 3
chr1	27097783	27097784	GA	AC	exonic	ARID1A	nonframeshift substitution	ARID1A:NM_006015:exon12:c.3372_3373AC:p.K1125Q,ARID1A:NM_139135:exon12:c.3372_3373AC:p.K1125Q	Tier 3
chr11	22646562	22646562	-	TTGTCATTA	exonic	FANCF	nonframeshift insertion	FANCF:NM_022725:exon1:c.794_795insTAATGACAA:p.S265_R266insNDN	Tier 3
chr11	22646564	22646564	-	CTGCTCATTTAATAAAAGAATAATTTGTAGTATAGGTATATACCTCAATCAGTGATTTTGTTGTTGGAAACAGAAC	exonic	FANCF	stopgain	FANCF:NM_022725:exon1:c.792_793insGTTCTGTTTCCAACAACAAAATCACTGATTGAGGTATATACCTATACTACAAATTATTCTTTTATTAAATGAGCAG:p.S265Vfs*23	NA
chr13	32907432	32907433	CG	-	exonic	BRCA2	frameshift deletion	BRCA2:NM_000059:exon10:c.1817_1818del:p.P606Qfs*8	Tier 2
chr13	32907437	32907437	-	GT	exonic	BRCA2	frameshift insertion	BRCA2:NM_000059:exon10:c.1822_1823insGT:p.D608Gfs*6	Tier 2
chr13	32907441	32907443	AAA	-	exonic	BRCA2	nonframeshift deletion	BRCA2:NM_000059:exon10:c.1826_1828del:p.K610del	Tier 3
chr13	32907443	32907443	-	TG	exonic	BRCA2	frameshift insertion	BRCA2:NM_000059:exon10:c.1828_1829insTG:p.K610Mfs*4	Tier 2
chr13	32907451	32907451	-	TTTG	exonic	BRCA2	frameshift insertion	BRCA2:NM_000059:exon10:c.1836_1837insTTTG:p.L613Ffs*3	Tier 2
chr13	32907456	32907456	-	G	exonic	BRCA2	frameshift insertion	BRCA2:NM_000059:exon10:c.1841_1842insG:p.I614Mfs*1	Tier 2
chr13	32907465	32907466	CA	-	exonic	BRCA2	frameshift deletion	BRCA2:NM_000059:exon10:c.1850_1851del:p.S617Cfs*3	Tier 2
chr13	32907469	32907472	CCAG	-	exonic	BRCA2	frameshift deletion	BRCA2:NM_000059:exon10:c.1854_1857del:p.Q619Lfs*23	Tier 2
chr13	32907475	32907479	TGAAG	-	exonic	BRCA2	frameshift deletion	BRCA2:NM_000059:exon10:c.1860_1864del:p.E621Kfs*3	Tier 2
chr13	32907492	32907499	AAGCACCA	-	exonic	BRCA2	frameshift deletion	BRCA2:NM_000059:exon10:c.1877_1884del:p.E626Afs*6	Tier 2
chr13	32907503	32907509	ACATTTG	-	exonic	BRCA2	frameshift deletion	BRCA2:NM_000059:exon10:c.1888_1894del:p.T630Qfs*11	Tier 2
chr13	32907514	32907515	TG	-	exonic	BRCA2	frameshift deletion	BRCA2:NM_000059:exon10:c.1899_1900del:p.A634fs*0	Tier 2
chr13	32907519	32907523	ATTCA	-	exonic	BRCA2	frameshift deletion	BRCA2:NM_000059:exon10:c.1904_1908del:p.D635Gfs*14	Tier 2
chr13	32912300	32912300	-	TCA	exonic	BRCA2	nonframeshift insertion	BRCA2:NM_000059:exon11:c.3808_3809insTCA:p.V1270_S1271insI	Tier 3
chr13	32912310	32912310	-	ATTTTG	exonic	BRCA2	nonframeshift insertion	BRCA2:NM_000059:exon11:c.3818_3819insATTTTG:p.F1273delinsLFC	NA
chr13	32912316	32912316	-	C	exonic	BRCA2	frameshift insertion	BRCA2:NM_000059:exon11:c.3824_3825insC:p.E1276Rfs*3	Tier 2
chr13	32912319	32912322	AAAA	-	exonic	BRCA2	frameshift deletion	BRCA2:NM_000059:exon11:c.3827_3830del:p.E1276Vfs*6	Tier 2
chr13	32912323	32912323	-	TGG	exonic	BRCA2	nonframeshift insertion	BRCA2:NM_000059:exon11:c.3831_3832insTGG:p.N1277_H1278insW	Tier 3
chr13	32912327	32912328	AA	-	exonic	BRCA2	frameshift deletion	BRCA2:NM_000059:exon11:c.3835_3836del:p.N1279fs*0	Tier 2
chr13	32912333	32912333	A	T	exonic	BRCA2	stopgain	BRCA2:NM_000059:exon11:c.A3841T:p.K1281X	Tier 2
chr13	32912334	32912334	-	TTTTTTT	exonic	BRCA2	frameshift insertion	BRCA2:NM_000059:exon11:c.3842_3843insTTTTTTT:p.K1281Nfs*6	NA
chr13	32912341	32912341	-	C	exonic	BRCA2	frameshift insertion	BRCA2:NM_000059:exon11:c.3849_3850insC:p.S1284Qfs*1	Tier 2
chr13	32912345	32912351	GAAAAAA	-	exonic	BRCA2	frameshift deletion	BRCA2:NM_000059:exon11:c.3853_3859del:p.E1285Ifs*5	Tier 2
chr13	32912358	32912358	-	TT	exonic	BRCA2	frameshift insertion	BRCA2:NM_000059:exon11:c.3866_3867insTT:p.K1289Nfs*4	Tier 2
chr13	32912362	32912364	CCA	-	exonic	BRCA2	stopgain	BRCA2:NM_000059:exon11:c.3870_3872del:p.C1290_I3418del	Tier 2
chr13	32912365	32912365	-	TTTT	exonic	BRCA2	frameshift insertion	BRCA2:NM_000059:exon11:c.3873_3874insTTTT:p.L1292Ffs*6	Tier 2
chr13	32912368	32912368	G	-	exonic	BRCA2	frameshift deletion	BRCA2:NM_000059:exon11:c.3876delG:p.I1293Yfs*7	Tier 2
chr13	32932002	32932002	-	C	exonic	BRCA2	frameshift insertion	BRCA2:NM_000059:exon16:c.7741_7742insC:p.L2581Sfs*2	Tier 2
chr13	32932004	32932004	-	CTGTACCTTTTCCACCCCGTTTATAC	exonic	BRCA2	frameshift insertion	BRCA2:NM_000059:exon16:c.7743_7744insCTGTACCTTTTCCACCCCGTTTATAC:p.A2582Lfs*74	Tier 2
chr13	32932006	32932006	-	CTCCTGCTAAATCTGCCATAGGAAGGTACTGTGAGGATAAAAAAATG	exonic	BRCA2	stopgain	BRCA2:NM_000059:exon16:c.7745_7746insCTCCTGCTAAATCTGCCATAGGAAGGTACTGTGAGGATAAAAAAATG:p.D2583Sfs*2	Tier 2
chr13	32936731	32936731	-	TACTGATAATTTTAGTATAAAAAGCATATTCTTCAGACAGTTAAAGTTTTTGTGCAGTTTTTGGGAGGTCCAGA	exonic	BRCA2	frameshift insertion	BRCA2:NM_000059:exon17:c.7877_7878insTACTGATAATTTTAGTATAAAAAGCATATTCTTCAGACAGTTAAAGTTTTTGTGCAGTTTTTGGGAGGTCCAGA:p.W2626Cfs*46	NA
chr13	32968998	32968998	-	GGCAA	exonic	BRCA2	frameshift insertion	BRCA2:NM_000059:exon25:c.9429_9430insGGCAA:p.S3144Gfs*20	Tier 2
chr13	32968999	32968999	-	AC	exonic	BRCA2	frameshift insertion	BRCA2:NM_000059:exon25:c.9430_9431insAC:p.S3144Yfs*19	Tier 2
chr13	32969001	32969001	-	A	exonic	BRCA2	frameshift insertion	BRCA2:NM_000059:exon25:c.9432_9433insA:p.V3145Sfs*4	Tier 2
chr13	32969002	32969002	-	CAAAGACACA	exonic	BRCA2	frameshift insertion	BRCA2:NM_000059:exon25:c.9433_9434insCAAAGACACA:p.V3145Afs*7	Tier 2
chr13	32969005	32969005	-	CCA	exonic	BRCA2	nonframeshift insertion	BRCA2:NM_000059:exon25:c.9436_9437insCCA:p.F3146delinsSI	Tier 3
chr13	32969008	32969008	-	A	exonic	BRCA2	frameshift insertion	BRCA2:NM_000059:exon25:c.9439_9440insA:p.S3147Yfs*2	Tier 2
chr13	32969009	32969009	-	CTT	exonic	BRCA2	nonframeshift insertion	BRCA2:NM_000059:exon25:c.9440_9441insCTT:p.S3147_A3148insF	Tier 3
chr13	32969012	32969012	-	ACCCAG	exonic	BRCA2	nonframeshift insertion	BRCA2:NM_000059:exon25:c.9443_9444insACCCAG:p.A3148_S3149insPS	Tier 3
chr13	32969018	32969027	CAAAAGAGGG	-	exonic	BRCA2	frameshift deletion	BRCA2:NM_000059:exon25:c.9449_9458del:p.K3151Tfs*8	Tier 2
chr13	32969031	32969031	C	-	exonic	BRCA2	frameshift deletion	BRCA2:NM_000059:exon25:c.9462delC:p.Q3156Kfs*6	Tier 2
chr13	32969035	32969035	-	TTGTACTCCTCTCTG	exonic	BRCA2	nonframeshift insertion	BRCA2:NM_000059:exon25:c.9466_9467insTTGTACTCCTCTCTG:p.Q3156delinsLVLLSE	Tier 3
chr13	32969038	32969038	-	AT	exonic	BRCA2	frameshift insertion	BRCA2:NM_000059:exon25:c.9469_9470insAT:p.E3157Dfs*6	Tier 2
chr13	32969045	32969046	TC	CT	exonic	BRCA2	nonframeshift substitution	BRCA2:NM_000059:exon25:c.9476_9477CT:p.F3159S	Tier 3
chr13	32969054	32969054	T	-	exonic	BRCA2	frameshift deletion	BRCA2:NM_000059:exon25:c.9485delT:p.M3162Rfs*54	Tier 2
chr13	32969056	32969056	A	T	exonic	BRCA2	stopgain	BRCA2:NM_000059:exon25:c.A9487T:p.K3163X	Tier 3
chr13	32972530	32972530	-	TAAGATAGGCCTCTAATATCCATGGTGACAACCGCCCCTTCTGTGATAGGAGCTCTCATTTGTAAATC	exonic	BRCA2	stopgain	BRCA2:NM_000059:exon27:c.9880_9881insTAAGATAGGCCTCTAATATCCATGGTGACAACCGCCCCTTCTGTGATAGGAGCTCTCATTTGTAAATC:p.A3294Vfs*2	NA
chr13	32912339	32912339	G	-	exonic	BRCA2	stopgain	BRCA2:NM_000059:exon11:c.3847delG:p.V1283fs*0	Tier 2
chr14	69061250	69061251	AA	TG	exonic	RAD51B	nonframeshift substitution	RAD51B:NM_133509:exon11:c.1085_1086TG:p.E362V	Tier 3
chr14	69061276	69061276	C	T	exonic	RAD51B	stopgain	RAD51B:NM_133509:exon11:c.C1111T:p.Q371X	Tier 3
chr15	91341435	91341446	GATGTGACTGAC	-	exonic	BLM	nonframeshift deletion	BLM:NM_000057:exon17:c.3226_3237del:p.T1078_V1081del,BLM:NM_001287247:exon17:c.3226_3237del:p.T1078_V1081del,BLM:NM_001287248:exon17:c.2101_2112del:p.T703_V706del,BLM:NM_001287246:exon18:c.3226_3237del:p.T1078_V1081del	Tier 3
chr16	23647323	23647423	TTTCTTCCTGTTCCTTTAGTCTTTTCCCAGACAATCTGAGTGAATCAGTGCCAAAGACACAGTCTCTCTCCTGTGAAATAAATGTCCTCTTCTGCTGCTTC	-	exonic	PALB2	frameshift deletion	PALB2:NM_024675:exon4:c.444_544del:p.K148Nfs*2	Tier 2
chr16	89805543	89805543	-	AAACAGGAA	exonic	FANCA	nonframeshift insertion	FANCA:NM_000135:exon41:c.4164_4165insTTCCTGTTT:p.G1388_Q1389insFLF,FANCA:NM_001286167:exon41:c.4164_4165insTTCCTGTTT:p.G1388_Q1389insFLF	Tier 3
chr16	89805546	89805546	-	AGGTATCAA	exonic	FANCA	nonframeshift insertion	FANCA:NM_000135:exon41:c.4161_4162insTTGATACCT:p.K1387_G1388insLIP,FANCA:NM_001286167:exon41:c.4161_4162insTTGATACCT:p.K1387_G1388insLIP	Tier 3
chr16	89805548	89805548	-	ATAAGGAAGACG	exonic	FANCA	stopgain	FANCA:NM_000135:exon41:c.4159_4160insCGTCTTCCTTAT:p.K1387_F1455delinsTSSL,FANCA:NM_001286167:exon41:c.4159_4160insCGTCTTCCTTAT:p.K1387_G1424delinsTSSL	Tier 3
chr17	41246678	41246678	-	CTGATCAAATTCTGAATTTCTTCTCTGTGTATTTAAAGCATCACCAAAATGAAATAAAAATATAAATTAATAAAAAGAAG	exonic	BRCA1	stopgain	BRCA1:NM_007297:exon9:c.728_729insCTTCTTTTTATTAATTTATATTTTTATTTCATTTTGGTGATGCTTTAAATACACAGAGAAGAAATTCAGAATTTGATCAG:p.L243Ffs*13,BRCA1:NM_007294:exon10:c.869_870insCTTCTTTTTATTAATTTATATTTTTATTTCATTTTGGTGATGCTTTAAATACACAGAGAAGAAATTCAGAATTTGATCAG:p.L290Ffs*13,BRCA1:NM_007300:exon10:c.869_870insCTTCTTTTTATTAATTTATATTTTTATTTCATTTTGGTGATGCTTTAAATACACAGAGAAGAAATTCAGAATTTGATCAG:p.L290Ffs*13	NA
chr17	59878682	59878684	GTT	-	exonic	BRIP1	nonframeshift deletion	BRIP1:NM_032043:exon8:c.1070_1072del:p.E357_L358delinsV	Tier 3
chr17	59878690	59878690	G	C	exonic	BRIP1	nonsynonymous SNV	BRIP1:NM_032043:exon8:c.C1064G:p.A355G	Tier 3
chr17	59878695	59878695	-	AAC	exonic	BRIP1	stopgain	BRIP1:NM_032043:exon8:c.1058_1059insGTT:p.Y353_K1249del	NA
chr17	59878699	59878699	-	ACAAG	exonic	BRIP1	frameshift insertion	BRIP1:NM_032043:exon8:c.1054_1055insCTTGT:p.Y352Sfs*8	Tier 2
chr17	59878731	59878731	G	-	exonic	BRIP1	frameshift deletion	BRIP1:NM_032043:exon8:c.1023delC:p.S342Afs*5	Tier 2
chr17	59878736	59878736	G	C	exonic	BRIP1	nonsynonymous SNV	BRIP1:NM_032043:exon8:c.C1018G:p.L340V	Tier 3
chr17	59878737	59878737	-	A	exonic	BRIP1	frameshift insertion	BRIP1:NM_032043:exon8:c.1016_1017insT:p.E339Dfs*24	Tier 2
chr17	59878747	59878756	TCCCAGGCTT	-	exonic	BRIP1	frameshift deletion	BRIP1:NM_032043:exon8:c.998_1007del:p.K333Ifs*1	Tier 2
chr17	59878688	59878688	G	A	exonic	BRIP1	stopgain	BRIP1:NM_032043:exon8:c.C1066T:p.R356X	Tier 2
chr22	29121294	29121294	-	GTTCTCTGTATTTGTTGAATTTGAATGTTGACCTGCCTTGCTAGGTTGGGGAAGTTCTCCTGGATAATATCCTGCAGAGTGTTTTCCAACTTGGTTCCATTC	exonic	CHEK2	nonframeshift insertion	CHEK2:NM_001349956:exon3:c.380_381insGAATGGAACCAAGTTGGAAAACACTCTGCAGGATATTATCCAGGAGAACTTCCCCAACCTAGCAAGGCAGGTCAACATTCAAATTCAACAAATACAGAGAAC:p.E127_P128insNGTKLENTLQDIIQENFPNLARQVNIQIQQIQRT,CHEK2:NM_007194:exon3:c.380_381insGAATGGAACCAAGTTGGAAAACACTCTGCAGGATATTATCCAGGAGAACTTCCCCAACCTAGCAAGGCAGGTCAACATTCAAATTCAACAAATACAGAGAAC:p.E127_P128insNGTKLENTLQDIIQENFPNLARQVNIQIQQIQRT,CHEK2:NM_145862:exon3:c.…	NA
chr3	142274739	142274739	-	T	exonic	ATR	frameshift insertion	ATR:NM_001184:exon10:c.2320dupA:p.I774Nfs*2	Tier 3
chr5	131944404	131944404	-	CTTGGCTGCTTCATTTACTGGCTGTTGTGACCCTGGACAAATCATTCTCTGTGTCTGTTTGCTCGTTTGAAATATAGGACTGAAAATG	exonic	RAD50	stopgain	RAD50:NM_005732:exon17:c.2816_2817insCTTGGCTGCTTCATTTACTGGCTGTTGTGACCCTGGACAAATCATTCTCTGTGTCTGTTTGCTCGTTTGAAATATAGGACTGAAAATG:p.A940Lfs*22	NA
chr5	131931451	131931451	-	A	exonic	RAD50	frameshift insertion	RAD50:NM_005732:exon13:c.2157dupA:p.E723Gfs*4	NA
chr6	157099872	157099874	CCG	-	exonic	ARID1B	nonframeshift deletion	ARID1B:NM_001346813:exon1:c.809_811del:p.A274del,ARID1B:NM_017519:exon1:c.809_811del:p.A274del,ARID1B:NM_020732:exon1:c.809_811del:p.A274del	NA
chr6	157100397	157100399	CGC	-	exonic	ARID1B	nonframeshift deletion	ARID1B:NM_001346813:exon1:c.1334_1336del:p.P450del,ARID1B:NM_017519:exon1:c.1334_1336del:p.P450del,ARID1B:NM_020732:exon1:c.1334_1336del:p.P450del	NA
chr6	157521900	157521900	-	TTGTCACCGCTGGCCTTGTCTCGGGTTGTCAATGGGCCCAGGGGCCTTGCTGCTCTGTCTATGTAGACAGTCACCTGGGACGTAGCCATG	exonic	ARID1B	stopgain	ARID1B:NM_017519:exon17:c.4133_4134insTTGTCACCGCTGGCCTTGTCTCGGGTTGTCAATGGGCCCAGGGGCCTTGCTGCTCTGTCTATGTAGACAGTCACCTGGGACGTAGCCATG:p.M1378_L2236delinsICHRWPCLGLSMGPGALLLCLCRQSPGT,ARID1B:NM_001346813:exon18:c.4292_4293insTTGTCACCGCTGGCCTTGTCTCGGGTTGTCAATGGGCCCAGGGGCCTTGCTGCTCTGTCTATGTAGACAGTCACCTGGGACGTAGCCATG:p.M1431_L2289delinsICHRWPCLGLSMGPGALLLCLCRQSPGT,ARID1B:NM_020732:exon18:c.4172_4173insTTGT…	NA
chr6	157099166	157099168	TCC	-	exonic	ARID1B	nonframeshift deletion	ARID1B:NM_001346813:exon1:c.103_105del:p.S41del,ARID1B:NM_017519:exon1:c.103_105del:p.S41del,ARID1B:NM_020732:exon1:c.103_105del:p.S41del	NA
chr8	30945377	30945379	AAG	-	exonic	WRN	nonframeshift deletion	WRN:NM_000553:exon12:c.1517_1519del:p.E510del	Tier 3
chr8	30958426	30958426	-	TGTTAATATGATGATATTTATGCTTCTGTTTTTATAGGAACCAAATACTTTGATTTGGTTATTTATTCTCCTTTGGAGATGTA	exonic	WRN	stopgain	WRN:NM_000553:exon18:c.2043_2044insTGTTAATATGATGATATTTATGCTTCTGTTTTTATAGGAACCAAATACTTTGATTTGGTTATTTATTCTCCTTTGGAGATGTA:p.D682Cfs*1	NA
chrX	76763950	76763950	T	A	exonic	ATRX	nonsynonymous SNV	ATRX:NM_138270:exon34:c.A7244T:p.Q2415L,ATRX:NM_000489:exon35:c.A7358T:p.Q2453L	Tier 3
chrX	76763953	76763960	TGGTAGTT	-	exonic	ATRX	frameshift deletion	ATRX:NM_138270:exon34:c.7234_7241del:p.N2412Afs*2,ATRX:NM_000489:exon35:c.7348_7355del:p.N2450Afs*2	Tier 3
chrX	76763962	76763962	-	C	exonic	ATRX	frameshift insertion	ATRX:NM_138270:exon34:c.7231_7232insG:p.S2411Cfs*1,ATRX:NM_000489:exon35:c.7345_7346insG:p.S2449Cfs*1	Tier 3
chrX	76763965	76763969	GGATT	-	exonic	ATRX	frameshift deletion	ATRX:NM_138270:exon34:c.7225_7229del:p.N2409Ffs*1,ATRX:NM_000489:exon35:c.7339_7343del:p.N2447Ffs*1	Tier 3
chrX	76763972	76763973	TG	GC	exonic	ATRX	nonframeshift substitution	ATRX:NM_138270:exon34:c.7221_7222GC:p.I2407_M2408delinsML,ATRX:NM_000489:exon35:c.7335_7336GC:p.I2445_M2446delinsML	NA
chrX	76763975	76763975	T	A	exonic	ATRX	nonsynonymous SNV	ATRX:NM_138270:exon34:c.A7219T:p.I2407F,ATRX:NM_000489:exon35:c.A7333T:p.I2445F	Tier 3
chrX	76763981	76763985	TTGGG	-	exonic	ATRX	frameshift deletion	ATRX:NM_138270:exon34:c.7209_7213del:p.P2404Ffs*6,ATRX:NM_000489:exon35:c.7323_7327del:p.P2442Ffs*6	Tier 3
chrX	76763991	76763994	TGGC	-	exonic	ATRX	frameshift deletion	ATRX:NM_138270:exon34:c.7200_7203del:p.M2400Ifs*5,ATRX:NM_000489:exon35:c.7314_7317del:p.M2438Ifs*5	Tier 3
chrX	76763998	76763998	-	ACAAGCAACAC	exonic	ATRX	frameshift insertion	ATRX:NM_138270:exon34:c.7195_7196insGTGTTGCTTGT:p.M2399Sfs*4,ATRX:NM_000489:exon35:c.7309_7310insGTGTTGCTTGT:p.M2437Sfs*4	Tier 3
chrX	76764001	76764001	A	-	exonic	ATRX	frameshift deletion	ATRX:NM_138270:exon34:c.7193delT:p.L2398Pfs*1,ATRX:NM_000489:exon35:c.7307delT:p.L2436Pfs*1	Tier 3
chrX	76764005	76764005	G	C	exonic	ATRX	nonsynonymous SNV	ATRX:NM_138270:exon34:c.C7189G:p.H2397D,ATRX:NM_000489:exon35:c.C7303G:p.H2435D	Tier 3
chrX	76764008	76764008	-	T	exonic	ATRX	frameshift insertion	ATRX:NM_138270:exon34:c.7185_7186insA:p.G2396Rfs*16,ATRX:NM_000489:exon35:c.7299_7300insA:p.G2434Rfs*16	Tier 3
chrX	76764011	76764021	GTGTTGCTTGT	-	exonic	ATRX	frameshift deletion	ATRX:NM_138270:exon34:c.7173_7183del:p.Q2391Hfs*17,ATRX:NM_000489:exon35:c.7287_7297del:p.Q2429Hfs*17	Tier 3
chrX	76764025	76764025	-	GCCA	exonic	ATRX	frameshift insertion	ATRX:NM_138270:exon34:c.7168_7169insTGGC:p.Y2390Lfs*23,ATRX:NM_000489:exon35:c.7282_7283insTGGC:p.Y2428Lfs*23	Tier 3
chrX	76764030	76764030	-	CCCAA	exonic	ATRX	frameshift insertion	ATRX:NM_138270:exon34:c.7163_7164insTTGGG:p.M2388Ifs*13,ATRX:NM_000489:exon35:c.7277_7278insTTGGG:p.M2426Ifs*13	Tier 3
chrX	76764034	76764048	TGTTGCTGTTGCTGC	-	exonic	ATRX	nonframeshift deletion	ATRX:NM_138270:exon34:c.7146_7160del:p.Q2383_Q2387del,ATRX:NM_000489:exon35:c.7260_7274del:p.Q2421_Q2425del	Tier 3
chrX	76764053	76764062	TGTACTGCTG	-	exonic	ATRX	frameshift deletion	ATRX:NM_138270:exon34:c.7132_7141del:p.Q2378Ifs*7,ATRX:NM_000489:exon35:c.7246_7255del:p.Q2416Ifs*7	Tier 3
chrX	76764063	76764063	-	A	exonic	ATRX	frameshift insertion	ATRX:NM_138270:exon34:c.7130_7131insT:p.Q2377Hfs*35,ATRX:NM_000489:exon35:c.7244_7245insT:p.Q2415Hfs*35	Tier 3
chrX	76764068	76764068	G	T	exonic	ATRX	nonsynonymous SNV	ATRX:NM_138270:exon34:c.C7126A:p.L2376I,ATRX:NM_000489:exon35:c.C7240A:p.L2414I	Tier 3
chrX	76764074	76764079	TGTTCA	-	exonic	ATRX	nonframeshift deletion	ATRX:NM_138270:exon34:c.7115_7120del:p.M2372_N2373del,ATRX:NM_000489:exon35:c.7229_7234del:p.M2410_N2411del	Tier 3
chrX	76764083	76764089	GTATTCG	-	exonic	ATRX	frameshift deletion	ATRX:NM_138270:exon34:c.7105_7111del:p.R2369Lfs*1,ATRX:NM_000489:exon35:c.7219_7225del:p.R2407Lfs*1	Tier 3
chrX	76931787	76931787	T	C	exonic	ATRX	nonsynonymous SNV	ATRX:NM_138270:exon9:c.A3629G:p.E1210G,ATRX:NM_000489:exon10:c.A3743G:p.E1248G	Tier 3
chrX	76931791	76931791	-	CTTAAATAAAAAACAAAACATCACATATATTTTTCACCCTTTTAATTTTCTCTTTTGGGTTTCTG	exonic	ATRX	stopgain	ATRX:NM_138270:exon9:c.3624_3625insCAGAAACCCAAAAGAGAAAATTAAAAGGGTGAAAAATATATGTGATGTTTTGTTTTTTATTTAAG:p.D1209Qfs*7,ATRX:NM_000489:exon10:c.3738_3739insCAGAAACCCAAAAGAGAAAATTAAAAGGGTGAAAAATATATGTGATGTTTTGTTTTTTATTTAAG:p.D1247Qfs*7	NA

## Sheet: SiSP-K01-Tier2
Chromosome	Start position (bp)	End position (bp)	Reference allele	Alternate allele	Functional consequence	Gene name	Exonic function	Amino acid change	Clinical evidence	Clinical variant
chr17	41246208	41246209	AC	-	exonic	BRCA1	frameshift deletion	BRCA1:NM_007297:exon9:c.1198_1199del:p.V400Sfs*7,BRCA1:NM_007294:exon10:c.1339_1340del:p.V447Sfs*7,BRCA1:NM_007300:exon10:c.1339_1340del:p.V447Sfs*7	Tier 2	p.Val447fs
chr17	41246211	41246232	CTTTCACTTTTACATATTAAAG	-	exonic	BRCA1	frameshift deletion	BRCA1:NM_007297:exon9:c.1175_1196del:p.A392Efs*6,BRCA1:NM_007294:exon10:c.1316_1337del:p.A439Efs*6,BRCA1:NM_007300:exon10:c.1316_1337del:p.A439Efs*6	Tier 2	p.Ala439_Leu440insTer
chr17	41246243	41246246	ATCA	-	exonic	BRCA1	frameshift deletion	BRCA1:NM_007297:exon9:c.1161_1164del:p.D388Lfs*4,BRCA1:NM_007294:exon10:c.1302_1305del:p.D435Lfs*4,BRCA1:NM_007300:exon10:c.1302_1305del:p.D435Lfs*4	Tier 2	p.Asp435fs
chr17	41246249	41246253	GGCCA	-	exonic	BRCA1	frameshift deletion	BRCA1:NM_007297:exon9:c.1154_1158del:p.L385Qfs*1,BRCA1:NM_007294:exon10:c.1295_1299del:p.L432Qfs*1,BRCA1:NM_007300:exon10:c.1295_1299del:p.L432Qfs*1	Tier 2	p.Leu432fs
chr17	41246266	41246271	TCTCTG	-	exonic	BRCA1	stopgain	BRCA1:NM_007297:exon9:c.1136_1141del:p.S379_Y1816del,BRCA1:NM_007294:exon10:c.1277_1282del:p.S426_Y1863del,BRCA1:NM_007300:exon10:c.1277_1282del:p.S426_Y1884del	Tier 2	p.Ser426Ter;p.Ser426fs
chr17	41246273	41246273	-	AAGT	exonic	BRCA1	frameshift insertion	BRCA1:NM_007297:exon9:c.1133_1134insACTT:p.S379Lfs*10,BRCA1:NM_007294:exon10:c.1274_1275insACTT:p.S426Lfs*10,BRCA1:NM_007300:exon10:c.1274_1275insACTT:p.S426Lfs*10	Tier 2	p.Ser426Ter;p.Ser426fs
chr17	41246277	41246278	CC	-	exonic	BRCA1	frameshift deletion	BRCA1:NM_007297:exon9:c.1129_1130del:p.G377Ffs*10,BRCA1:NM_007294:exon10:c.1270_1271del:p.G424Ffs*10,BRCA1:NM_007300:exon10:c.1270_1271del:p.G424Ffs*10	Tier 2	NA
chr17	41246282	41246283	AT	-	exonic	BRCA1	frameshift deletion	BRCA1:NM_007297:exon9:c.1124_1125del:p.Y375Ffs*12,BRCA1:NM_007294:exon10:c.1265_1266del:p.Y422Ffs*12,BRCA1:NM_007300:exon10:c.1265_1266del:p.Y422Ffs*12	Tier 2	p.Tyr422Ter
chr17	41246289	41246289	T	-	exonic	BRCA1	frameshift deletion	BRCA1:NM_007297:exon9:c.1118delA:p.D373Vfs*9,BRCA1:NM_007294:exon10:c.1259delA:p.D420Vfs*9,BRCA1:NM_007300:exon10:c.1259delA:p.D420Vfs*9	Tier 2	p.Asp420fs
chr17	41246291	41246306	TACCTCATTTAGAACG	-	exonic	BRCA1	frameshift deletion	BRCA1:NM_007297:exon9:c.1101_1116del:p.D367Efs*10,BRCA1:NM_007294:exon10:c.1242_1257del:p.D414Efs*10,BRCA1:NM_007300:exon10:c.1242_1257del:p.D414Efs*10	Tier 2	p.Asp414fs
chr13	32953940	32953940	-	TT	exonic	BRCA2	frameshift insertion	BRCA2:NM_000059:exon23:c.9007_9008insTT:p.G3003Vfs*25	Tier 2	p.Gly3003Ter
chr13	32953946	32953946	-	T	exonic	BRCA2	frameshift insertion	BRCA2:NM_000059:exon23:c.9013_9014insT:p.R3005Mfs*11	Tier 2	NA
chr13	32953951	32953953	CAG	-	exonic	BRCA2	stopgain	BRCA2:NM_000059:exon23:c.9018_9020del:p.Y3006_I3418del	Tier 2	p.Tyr3006Ter;p.Tyr3006fs
chr13	32953962	32953962	A	-	exonic	BRCA2	frameshift deletion	BRCA2:NM_000059:exon23:c.9029delA:p.H3010Lfs*17	Tier 2	p.His3010fs
chr13	32969009	32969009	-	AATATCATGATGATGATGA	exonic	BRCA2	stopgain	BRCA2:NM_000059:exon25:c.9440_9441insAATATCATGATGATGATGA:p.A3148Ifs*2	Tier 2	p.Ala3148fs
chr16	23647323	23647423	TTTCTTCCTGTTCCTTTAGTCTTTTCCCAGACAATCTGAGTGAATCAGTGCCAAAGACACAGTCTCTCTCCTGTGAAATAAATGTCCTCTTCTGCTGCTTC	-	exonic	PALB2	frameshift deletion	PALB2:NM_024675:exon4:c.444_544del:p.K148Nfs*2	Tier 2	NA

## Sheet: SiSP-K05-Tier2
Chromosome	Start position (bp)	End position (bp)	Reference allele	Alternate allele	Functional consequence	Gene name	Exonic function	Amino acid change	Clinical evidence	Clinical variant
chr13	32907432	32907433	CG	-	exonic	BRCA2	frameshift deletion	BRCA2:NM_000059:exon10:c.1817_1818del:p.P606Qfs*8	Tier 2	p.Pro606fs
chr13	32907437	32907437	-	GT	exonic	BRCA2	frameshift insertion	BRCA2:NM_000059:exon10:c.1822_1823insGT:p.D608Gfs*6	Tier 2	NA
chr13	32907443	32907443	-	TG	exonic	BRCA2	frameshift insertion	BRCA2:NM_000059:exon10:c.1828_1829insTG:p.K610Mfs*4	Tier 2	NA
chr13	32907451	32907451	-	TTTG	exonic	BRCA2	frameshift insertion	BRCA2:NM_000059:exon10:c.1836_1837insTTTG:p.L613Ffs*3	Tier 2	NA
chr13	32907456	32907456	-	G	exonic	BRCA2	frameshift insertion	BRCA2:NM_000059:exon10:c.1841_1842insG:p.I614Mfs*1	Tier 2	p.Ile614fs
chr13	32907465	32907466	CA	-	exonic	BRCA2	frameshift deletion	BRCA2:NM_000059:exon10:c.1850_1851del:p.S617Cfs*3	Tier 2	p.Ser617Ter
chr13	32907469	32907472	CCAG	-	exonic	BRCA2	frameshift deletion	BRCA2:NM_000059:exon10:c.1854_1857del:p.Q619Lfs*23	Tier 2	p.Gln619fs;p.Gln619Ter
chr13	32907475	32907479	TGAAG	-	exonic	BRCA2	frameshift deletion	BRCA2:NM_000059:exon10:c.1860_1864del:p.E621Kfs*3	Tier 2	NA
chr13	32907492	32907499	AAGCACCA	-	exonic	BRCA2	frameshift deletion	BRCA2:NM_000059:exon10:c.1877_1884del:p.E626Afs*6	Tier 2	NA
chr13	32907503	32907509	ACATTTG	-	exonic	BRCA2	frameshift deletion	BRCA2:NM_000059:exon10:c.1888_1894del:p.T630Qfs*11	Tier 2	p.Thr630fs
chr13	32907514	32907515	TG	-	exonic	BRCA2	frameshift deletion	BRCA2:NM_000059:exon10:c.1899_1900del:p.A634fs*0	Tier 2	p.Ala634fs
chr13	32907519	32907523	ATTCA	-	exonic	BRCA2	frameshift deletion	BRCA2:NM_000059:exon10:c.1904_1908del:p.D635Gfs*14	Tier 2	NA
chr13	32912316	32912316	-	C	exonic	BRCA2	frameshift insertion	BRCA2:NM_000059:exon11:c.3824_3825insC:p.E1276Rfs*3	Tier 2	NA
chr13	32912319	32912322	AAAA	-	exonic	BRCA2	frameshift deletion	BRCA2:NM_000059:exon11:c.3827_3830del:p.E1276Vfs*6	Tier 2	NA
chr13	32912327	32912328	AA	-	exonic	BRCA2	frameshift deletion	BRCA2:NM_000059:exon11:c.3835_3836del:p.N1279fs*0	Tier 2	p.Asn1279fs
chr13	32912333	32912333	A	T	exonic	BRCA2	stopgain	BRCA2:NM_000059:exon11:c.A3841T:p.K1281X	Tier 2	NA
chr13	32912341	32912341	-	C	exonic	BRCA2	frameshift insertion	BRCA2:NM_000059:exon11:c.3849_3850insC:p.S1284Qfs*1	Tier 2	p.Ser1284fs;p.Ser1284Ter
chr13	32912345	32912351	GAAAAAA	-	exonic	BRCA2	frameshift deletion	BRCA2:NM_000059:exon11:c.3853_3859del:p.E1285Ifs*5	Tier 2	NA
chr13	32912358	32912358	-	TT	exonic	BRCA2	frameshift insertion	BRCA2:NM_000059:exon11:c.3866_3867insTT:p.K1289Nfs*4	Tier 2	p.Lys1289fs
chr13	32912362	32912364	CCA	-	exonic	BRCA2	stopgain	BRCA2:NM_000059:exon11:c.3870_3872del:p.C1290_I3418del	Tier 2	p.Cys1290fs;p.Cys1290Ter
chr13	32912365	32912365	-	TTTT	exonic	BRCA2	frameshift insertion	BRCA2:NM_000059:exon11:c.3873_3874insTTTT:p.L1292Ffs*6	Tier 2	NA
chr13	32912368	32912368	G	-	exonic	BRCA2	frameshift deletion	BRCA2:NM_000059:exon11:c.3876delG:p.I1293Yfs*7	Tier 2	NA
chr13	32932002	32932002	-	C	exonic	BRCA2	frameshift insertion	BRCA2:NM_000059:exon16:c.7741_7742insC:p.L2581Sfs*2	Tier 2	NA
chr13	32932004	32932004	-	CTGTACCTTTTCCACCCCGTTTATAC	exonic	BRCA2	frameshift insertion	BRCA2:NM_000059:exon16:c.7743_7744insCTGTACCTTTTCCACCCCGTTTATAC:p.A2582Lfs*74	Tier 2	p.Ala2582fs
chr13	32932006	32932006	-	CTCCTGCTAAATCTGCCATAGGAAGGTACTGTGAGGATAAAAAAATG	exonic	BRCA2	stopgain	BRCA2:NM_000059:exon16:c.7745_7746insCTCCTGCTAAATCTGCCATAGGAAGGTACTGTGAGGATAAAAAAATG:p.D2583Sfs*2	Tier 2	NA
chr13	32968998	32968998	-	GGCAA	exonic	BRCA2	frameshift insertion	BRCA2:NM_000059:exon25:c.9429_9430insGGCAA:p.S3144Gfs*20	Tier 2	p.Ser3144fs
chr13	32968999	32968999	-	AC	exonic	BRCA2	frameshift insertion	BRCA2:NM_000059:exon25:c.9430_9431insAC:p.S3144Yfs*19	Tier 2	p.Ser3144fs
chr13	32969001	32969001	-	A	exonic	BRCA2	frameshift insertion	BRCA2:NM_000059:exon25:c.9432_9433insA:p.V3145Sfs*4	Tier 2	NA
chr13	32969002	32969002	-	CAAAGACACA	exonic	BRCA2	frameshift insertion	BRCA2:NM_000059:exon25:c.9433_9434insCAAAGACACA:p.V3145Afs*7	Tier 2	NA
chr13	32969008	32969008	-	A	exonic	BRCA2	frameshift insertion	BRCA2:NM_000059:exon25:c.9439_9440insA:p.S3147Yfs*2	Tier 2	NA
chr13	32969018	32969027	CAAAAGAGGG	-	exonic	BRCA2	frameshift deletion	BRCA2:NM_000059:exon25:c.9449_9458del:p.K3151Tfs*8	Tier 2	NA
chr13	32969031	32969031	C	-	exonic	BRCA2	frameshift deletion	BRCA2:NM_000059:exon25:c.9462delC:p.Q3156Kfs*6	Tier 2	p.Gln3156fs;p.Gln3156Ter
chr13	32969038	32969038	-	AT	exonic	BRCA2	frameshift insertion	BRCA2:NM_000059:exon25:c.9469_9470insAT:p.E3157Dfs*6	Tier 2	p.Glu3157fs
chr13	32969054	32969054	T	-	exonic	BRCA2	frameshift deletion	BRCA2:NM_000059:exon25:c.9485delT:p.M3162Rfs*54	Tier 2	NA
chr13	32912339	32912339	G	-	exonic	BRCA2	stopgain	BRCA2:NM_000059:exon11:c.3847delG:p.V1283fs*0	Tier 2	NA
chr16	23647323	23647423	TTTCTTCCTGTTCCTTTAGTCTTTTCCCAGACAATCTGAGTGAATCAGTGCCAAAGACACAGTCTCTCTCCTGTGAAATAAATGTCCTCTTCTGCTGCTTC	-	exonic	PALB2	frameshift deletion	PALB2:NM_024675:exon4:c.444_544del:p.K148Nfs*2	Tier 2	NA
chr17	59878699	59878699	-	ACAAG	exonic	BRIP1	frameshift insertion	BRIP1:NM_032043:exon8:c.1054_1055insCTTGT:p.Y352Sfs*8	Tier 2	no expert panel
chr17	59878731	59878731	G	-	exonic	BRIP1	frameshift deletion	BRIP1:NM_032043:exon8:c.1023delC:p.S342Afs*5	Tier 2	no expert panel
chr17	59878737	59878737	-	A	exonic	BRIP1	frameshift insertion	BRIP1:NM_032043:exon8:c.1016_1017insT:p.E339Dfs*24	Tier 2	no expert panel
chr17	59878747	59878756	TCCCAGGCTT	-	exonic	BRIP1	frameshift deletion	BRIP1:NM_032043:exon8:c.998_1007del:p.K333Ifs*1	Tier 2	no expert panel
chr17	59878688	59878688	G	A	exonic	BRIP1	stopgain	BRIP1:NM_032043:exon8:c.C1066T:p.R356X	Tier 2	no expert panel
